# Supplementary material for: Towards the Establishment of Relationship between Macroeconomic Indicators and Cost of Public Educational Buildings in Ghana
Source: Hindawi journal article supplement (doi:10.1155/2019/6791401), 2019-02-19
Supplement: f1 [file 6791401.f1.pdf]

**KWAME NKRUMAH UNIVERSITY OF SCIENCE AND TECHNOLOGY,  
KUMASI, GHANA**

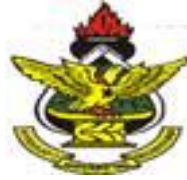

**Towards the Establishment of Relationship between Macroeconomic  
Indicators and Cost of Public Educational Buildings in Ghana**

**By**

**Richard Oduro Asamoah**

(BSc. Building Technology, MSc. Construction Management)

**Topic: Towards the Establishment of a Relationship between Macroeconomic and cost of Public Educational Buildings.**

Cost management for the building industry during construction period is a concern to all the parties in the building construction industry. This study is a preliminary work to establish a research gap for a PhD research programme on the need to identify the effect of changes in Macroeconomic components and cost of public educational buildings in Ghana. These questionnaires solicit opinion from professionals (Quantity Surveyors/Estimators) of the Development offices Public Universities in Ghana

Please select appropriate box - example

☐

1. What is your educational level?

a. HND

☐

b. BSc

☐

c. MSc/ MPhil

☐

d. PhD

☐

2. Are you involved in project cost management?

Yes

☐

b.

☐

3. Are you a member of the Ghana Institution of Surveyors?

Yes

☐

b. No

☐

b. if yes, how long (years)

a. 1- 5

☐

b. 6-10

☐

c. 11-15

☐

d. 16 - Above

☐

**Part II:**

4. Which of these cost management methods do you consider during project monitoring?

a. Cash Flow

☐

d. Budgetary Control

☐

b. Cost Control

☐

e. Cost Data

☐

c. Progress Report

☐

f. Any other .....

5. Are you satisfied with the level of cost monitoring during (Planned against Physical) construction phase?

a. Yes

☐

b. No

☐

5a. If yes, what is the level of accuracy in percentage?

5-25

☐

25-50

☐

50-75

☐

75-100

☐

6. How do you monitor contract sum of projects during construction phase?

- a. Historical data ☐ b. Cost Models ☐ c. Personal Experience ☐
- d. Any other .....

7. Which of these Macroeconomic Component have significant on cost of public construction during post contract?

| Item | Macroeconomic Components  | very Significant<br>4 | Significant<br>3 | low significant<br>2 | Not significant<br>1 |
|------|---------------------------|-----------------------|------------------|----------------------|----------------------|
| 1    | Taxation                  |                       |                  |                      |                      |
| 2    | Interest Rate             |                       |                  |                      |                      |
| 3    | Consumer Price Index      |                       |                  |                      |                      |
| 4    | Exchange Rate             |                       |                  |                      |                      |
| 5    | Gross Domestic Product    |                       |                  |                      |                      |
| 6    | Unemployment              |                       |                  |                      |                      |
| 7    | Foreign Direct Investment |                       |                  |                      |                      |
| 8    | Loan                      |                       |                  |                      |                      |
| 9    | Grant                     |                       |                  |                      |                      |
| 10   | Control of Inflation      |                       |                  |                      |                      |
| 11   | Producer Price Index      |                       |                  |                      |                      |
| 12   | Prime Rate (Central Bank) |                       |                  |                      |                      |
| 13   | Money Supply              |                       |                  |                      |                      |

8. Will you recommend the need for further research into the impact of macroeconomic variables on the cost of building construction in Ghana?

a. Yes

☐

b. No

☐

### Rating by Professionals

| Item | Macroeconomic Components    | Professional Quantity |    |   |   | Estimate |    |   |    |
|------|-----------------------------|-----------------------|----|---|---|----------|----|---|----|
|      | Rating of Significant       | 4                     | 3  | 2 | 1 | 4        | 3  | 2 | 1  |
| 1    | Taxation                    | 17                    | 3  | 0 | 0 | 17       | 2  | 1 | 0  |
| 2    | Interest Rate               | 18                    | 2  | 0 | 0 | 18       | 0  | 2 | 0  |
| 3    | Consumer Price Index        | 11                    | 6  | 2 | 1 | 9        | 7  | 2 | 2  |
| 4    | Exchange Rate               | 18                    | 2  | 0 | 0 | 17       | 3  | 0 | 0  |
| 5    | Gross Domestic Product      | 8                     | 8  | 1 | 3 | 3        | 4  | 8 | 5  |
| 6    | Unemployment                | 2                     | 4  | 8 | 6 | 0        | 4  | 6 | 10 |
| 7    | Foreign Direct Investment   | 4                     | 4  | 8 | 4 | 2        | 4  | 8 | 6  |
| 8    | Loan (Government Borrowing) | 13                    | 7  | 0 | 0 | 10       | 10 | 0 | 0  |
| 9    | Grant                       | 10                    | 10 | 0 | 0 | 10       | 10 | 0 | 0  |
| 10   | Inflation                   | 20                    | 0  | 0 | 0 | 17       | 3  | 0 | 0  |
| 11   | Producer Price Index        | 11                    | 9  | 0 | 0 | 10       | 10 | 0 | 0  |
| 12   | Prime Rate (Central Bank)   | 18                    | 2  | 0 | 0 | 18       | 1  | 1 | 0  |
| 13   | Money Supply                | 9                     | 9  | 1 | 1 | 10       | 8  | 2 | 0  |

### Final Analysis after using Relective Important Index (RII)

| Item | Macroeconomic Components    | Professional Quantity |         | Estimators |         | Average |         |
|------|-----------------------------|-----------------------|---------|------------|---------|---------|---------|
|      |                             | RII                   | Ranking | RII        | Ranking | RII     | Ranking |
| 1    | Taxation                    | 0.963                 | 5       | 0.950      | 4       | 0.96    | 4       |
| 2    | Interest Rate               | 0.975                 | 2       | 0.950      | 4       | 0.96    | 4       |
| 3    | Consumer Price Index        | 0.838                 | 10      | 0.788      | 10      | 0.81    | 10      |
| 4    | Exchange Rate               | 0.975                 | 2       | 0.963      | 3       | 0.97    | 3       |
| 5    | Gross Domestic Product      | 0.763                 | 11      | 0.600      | 11      | 0.68    | 11      |
| 6    | Unemployment                | 0.525                 | 13      | 0.425      | 13      | 0.48    | 13      |
| 7    | Foreign Direct Investment   | 0.600                 | 12      | 0.525      | 12      | 0.56    | 12      |
| 8    | Loan (Government Borrowing) | 0.913                 | 7       | 0.875      | 6       | 0.89    | 7       |
| 9    | Grant                       | 0.875                 | 9       | 0.875      | 6       | 0.88    | 8       |
| 10   | Inflation                   | 1.000                 | 1       | 0.975      | 1       | 0.99    | 1       |
| 11   | Producer Price Index        | 0.888                 | 8       | 0.875      | 6       | 0.88    | 8       |
| 12   | Prime Rate (Central Bank)   | 0.975                 | 2       | 0.975      | 1       | 0.98    | 2       |
| 13   | Money Supply                | 0.950                 | 6       | 0.850      | 9       | 0.90    | 6       |

**NOTE**

Relective Importnace Index(RII) =  $(4n_4 + 3n_3 + 2n_2 + n_1) / 4N$

$n_4$  - very Significant

$n_3$  - Significant

$n_2$  - low significant

$n_1$  - Not significant

Total Number of respondents (N) = 40

Professional Quantity Surveyors Registered with Ghana Instittution of Surveyors =20

Estimators not registered with Ghana Institution of Surveyors =20
